# Supplementary material
Source: HighWire-hosted journal article supplement (https://www.cmajopen.ca/highwire/filestream/89209/field_highwire_adjunct_files/0/open-2022-0006-1-at.pdf)
Supplement: open-2022-0006-1-at.pdf [file open-2022-0006-1-at.pdf]

## Appendix 1.

**Figure 1: Flow chart of patients\***

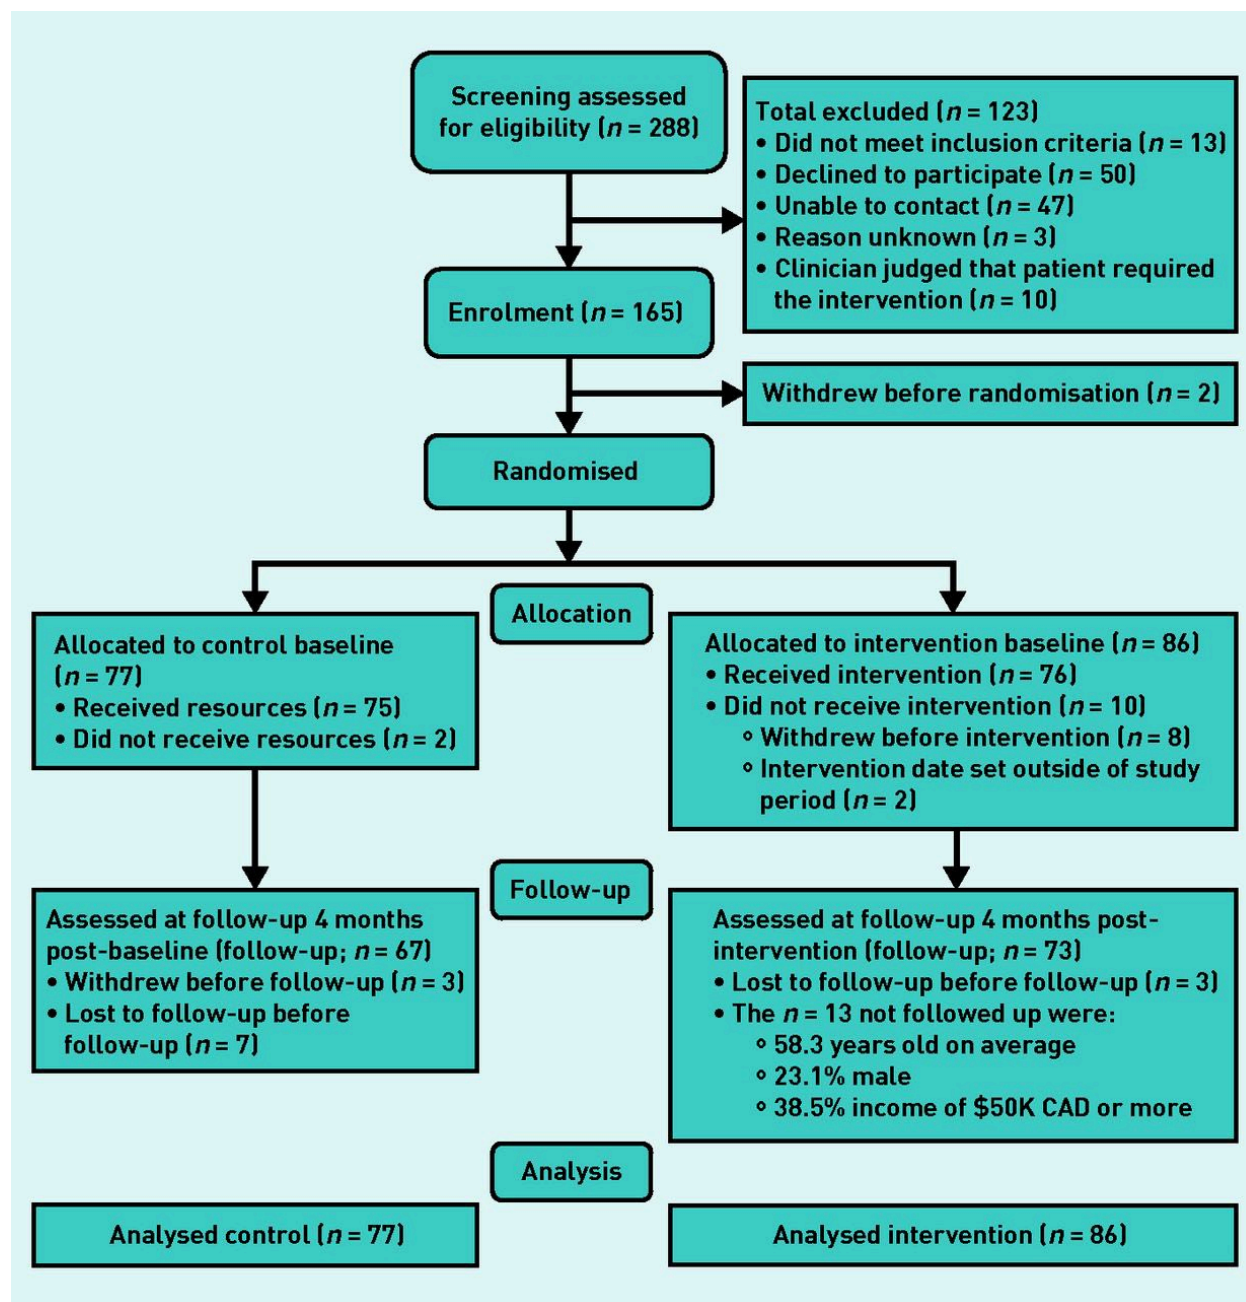

\*Reprinted with permission from British Journal of General Practice. Stewart M, Fortin M, Brown JB, et al. Patient-centred innovation for multimorbidity care: a mixed-methods, randomised trial and qualitative study of the patients' experience. *Br J Gen Pract* 2021; DOI: <https://doi.org/10.3399/bjgp21X714293>
